# Supplementary material for: Traditional Chinese Medicine in Cancer Care: An Overview of 5834 Randomized Controlled Trials Published in Chinese
Source: PubMed Central journal article supplement — Integr Cancer Ther. 2021 Jul 14;20:15347354211031650. doi: 10.1177/15347354211031650 (PMC8287414; doi:10.1177/15347354211031650), 2021-07-14
Supplement: sj-pdf-3-ict-10.1177_15347354211031650.pdf [file sj-pdf-3-ict-10.1177_15347354211031650.pdf]

**Supplementary table 3 Type of intervention in treatment group and control group for cancer patients in RCTs published in Chinese**

| <b>Intervention</b>               | <b>Treatment group</b> | <b>%(/5834)</b> | <b>Control group</b> | <b>%(/5834)</b> |
|-----------------------------------|------------------------|-----------------|----------------------|-----------------|
| <b>Chinese herbal medicine</b>    |                        |                 |                      |                 |
| herbal medicine                   | 5087                   | 87.20%          | 737                  | 12.63%          |
| proprietary herbal products       | 1368                   | 23.45%          | 492                  | 8.43%           |
| reporting ingredients             | 1117                   | 19.15%          | 407                  | 6.98%           |
| hospital prepared herbal medicine | 391                    | 6.70%           | 32                   | 0.55%           |
| reporting ingredients             | 404                    | 6.92%           | 27                   | 0.46%           |
| decoction                         | 3386                   | 58.04%          | 237                  | 4.06%           |
| reporting ingredients             | 3152                   | 54.03%          | 201                  | 3.45%           |
| individualized prescription       | 2934                   | 50.29%          | 195                  | 3.34%           |
| reporting ingredients             | 2768                   | 47.45%          | 166                  | 2.85%           |
| oral medication                   | 3783                   | 64.84%          | 437                  | 7.49%           |
| injection                         | 827                    | 14.18%          | 254                  | 4.35%           |
| external                          | 638                    | 10.94%          | 57                   | 0.98%           |
| infusion                          | 93                     | 1.59%           | 4                    | 0.07%           |
| foot bathing                      | 45                     | 0.77%           | 0                    | 0.00%           |
| nasal feeding                     | 31                     | 0.53%           | 2                    | 0.03%           |
| mouth rinsing                     | 27                     | 0.46%           | 3                    | 0.05%           |
| steaming and washing              | 23                     | 0.39%           | 0                    | 0.00%           |
| intravaginal administration       | 3                      | 0.05%           | 2                    | 0.03%           |
| aerosol inhalation                | 18                     | 0.31%           | 0                    | 0.00%           |
| <b>Acupoint stimulation</b>       |                        |                 |                      |                 |
| acupoint stimulation              | 1219                   | 20.89%          | 142                  | 2.43%           |

|                                                  |      |        |      |        |
|--------------------------------------------------|------|--------|------|--------|
| reporting acupoint composition                   | 1162 | 19.92% | 78   | 1.34%  |
| needling                                         | 306  | 5.25%  | 41   | 0.70%  |
| moxibustion                                      | 267  | 4.58%  | 15   | 0.26%  |
| acupoint sticking application                    | 215  | 3.69%  | 22   | 0.38%  |
| acupoint injection                               | 203  | 3.48%  | 37   | 0.63%  |
| acupressure                                      | 152  | 2.61%  | 7    | 0.12%  |
| ear acupuncture                                  | 122  | 2.09%  | 5    | 0.09%  |
| electronic acupuncture                           | 94   | 1.61%  | 6    | 0.10%  |
| point embedding therapy                          | 25   | 0.43%  | 0    | 0.00%  |
| laser or microwave stimulation                   | 5    | 0.09%  | 4    | 0.07%  |
| bee-sting therapy                                | 4    | 0.07%  | 0    | 0.00%  |
| cupping                                          | 2    | 0.03%  | 0    | 0.00%  |
| acupoint nerve stimulation                       | 2    | 0.03%  | 0    | 0.00%  |
| sham acupuncture (control group)                 | 0    | 0.00%  | 3    | 0.05%  |
| <b>Other TCM modalities</b>                      |      |        |      |        |
| Tuina (Chinese medical massage)                  | 133  | 2.28%  | 11   | 0.19%  |
| dietary therapy                                  | 131  | 2.25%  | 5    | 0.09%  |
| TCM psychological intervention                   | 44   | 0.75%  | 1    | 0.02%  |
| qigong                                           | 31   | 0.53%  | 1    | 0.02%  |
| TCM five element music therapy                   | 21   | 0.36%  | 0    | 0.00%  |
| <b>Conventional treatment</b>                    |      |        |      |        |
| chemotherapy                                     | 2325 | 39.85% | 2703 | 46.33% |
| conventional medicine or other routine treatment | 1472 | 25.23% | 3400 | 58.28% |
| radiotherapy                                     | 502  | 8.60%  | 299  | 5.13%  |
| interventional oncology therapy                  | 227  | 3.89%  | 219  | 3.75%  |
| surgery                                          | 158  | 2.71%  | 159  | 2.73%  |
